# Supplementary material for: The lymph node ratio as an independent prognostic factor for node-positive triple-negative breast cancer
Source: PubMed Central journal article supplement (PMC5546527; doi:10.18632/oncotarget.17413), 2017-04-25
Supplement: oncotarget-08-44870-s001.pdf [file oncotarget-08-44870-s001.pdf]

# The lymph node ratio as an independent prognostic factor for node-positive triple-negative breast cancer

## SUPPLEMENTARY FIGURES AND TABLES

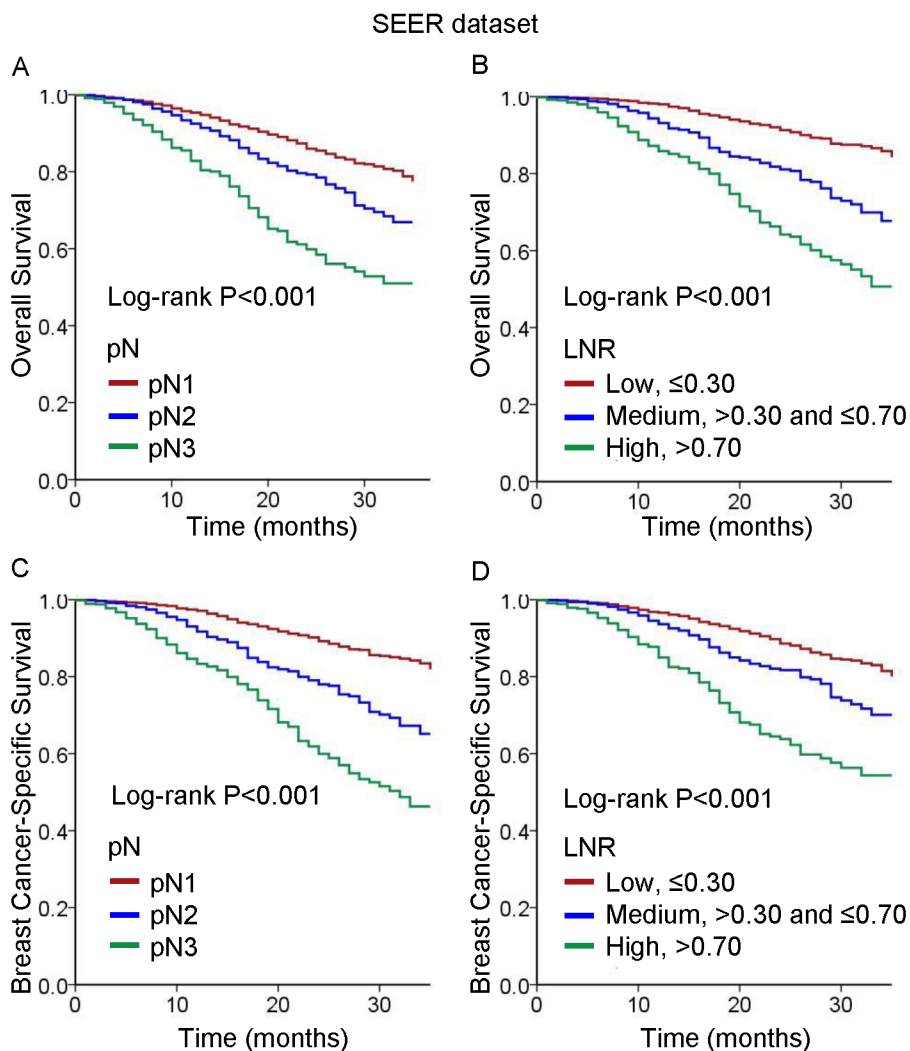

**Supplementary Figure 1: Kaplan-Meier cumulative survival curves generated from the SEER dataset for different pN stages and lymph node ratios (LNRs). (A, B) Overall survival (OS) and (C, D) breast cancer-specific survival (BCSS) for pN (A, C) and the LNR (B, D).**

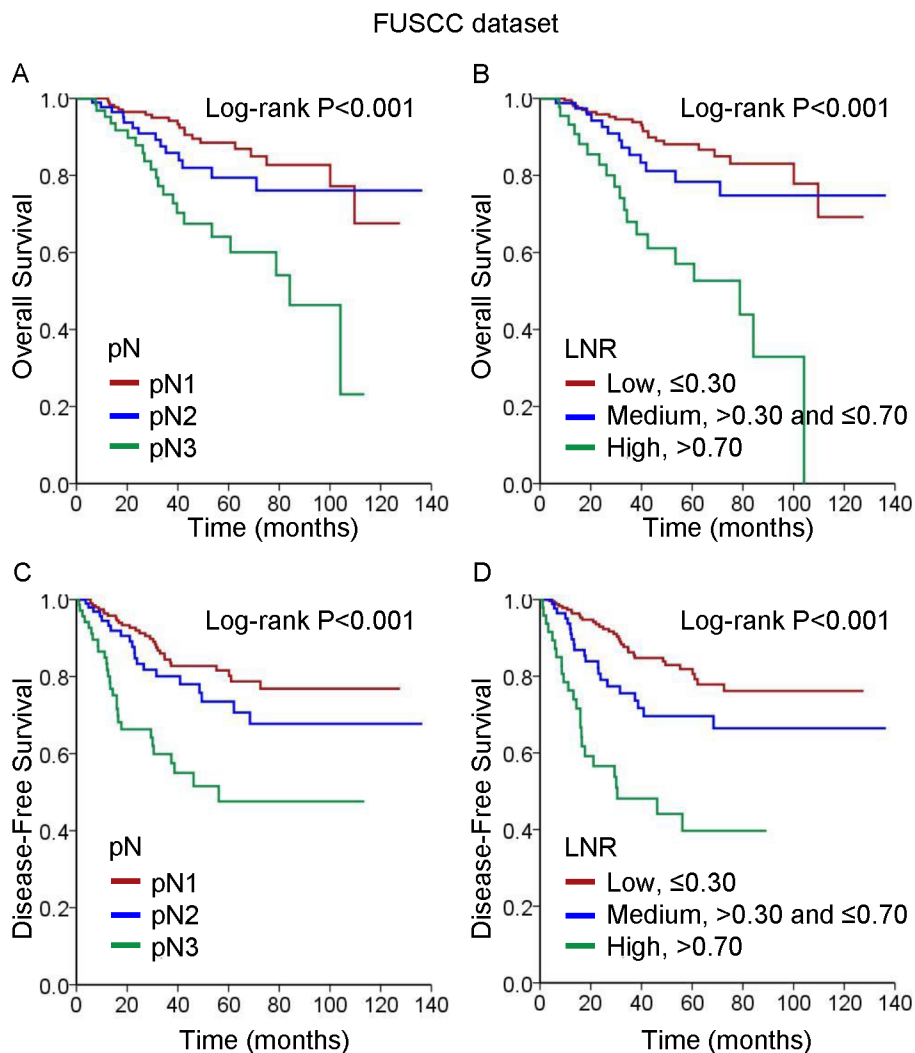

**Supplementary Figure 2: Kaplan-Meier cumulative survival curves generated from the FUSCC dataset for different pN stages and lymph node ratios (LNRs). (A, B) Overall survival (OS) and (C, D) disease-free survival (DFS) for pN (A, C) and the LNR (B, D).**

**Supplementary Table 1: Univariate analysis of overall survival and breast cancer-specific survival among patients from SEER**

| Variable                        | OS               |                | BCSS             |                |
|---------------------------------|------------------|----------------|------------------|----------------|
|                                 | HR (95% CI)      | P <sup>c</sup> | HR (95% CI)      | P <sup>c</sup> |
| Age at diagnosis, continuous    | 1.03 (1.02-1.03) | < <b>0.001</b> | 1.02 (1.01-1.02) | < <b>0.001</b> |
| Laterality                      |                  |                |                  |                |
| Left-sided                      | 1                | -              | 1                | -              |
| Right-sided                     | 1.05 (0.88-1.25) | 0.617          | 1.03 (0.85-1.25) | 0.739          |
| Race                            |                  |                |                  |                |
| White                           | 1                | -              | 1                | -              |
| Black                           | 1.30 (0.88-1.94) | 0.193          | 1.37 (0.88-2.13) | 0.167          |
| Other <sup>a</sup>              | 1.62 (1.06-2.46) | <b>0.026</b>   | 1.62 (1.01-2.58) | <b>0.045</b>   |
| Histological grade <sup>b</sup> |                  |                |                  |                |
| III                             | 1                | -              | 1                | -              |
| I+II                            | 0.80 (0.61-1.05) | 0.105          | 0.71 (0.52-0.96) | <b>0.029</b>   |
| Tumor size                      |                  |                |                  |                |
| <2cm                            | 1                | -              | 1                | -              |
| 2-5cm                           | 1.59 (1.23-2.07) | < <b>0.001</b> | 1.70 (1.27-2.29) | < <b>0.001</b> |
| >5cm                            | 4.19 (3.23-5.43) | < <b>0.001</b> | 4.83 (3.60-6.47) | < <b>0.001</b> |
| Surgery type                    |                  |                |                  |                |
| Mastectomy                      | 1                | -              | 1                | -              |
| Lumpectomy                      | 2.07 (1.67-2.56) | < <b>0.001</b> | 0.43 (0.34-0.55) | < <b>0.001</b> |
| Radiotherapy                    |                  |                |                  |                |
| Without RT                      | 1                | -              | 1                | -              |
| With RT                         | 0.55 (0.46-0.66) | < <b>0.001</b> | 0.58 (0.48-0.71) | < <b>0.001</b> |
| Lymph node ratio                |                  |                |                  |                |
| ≤0.30                           | 1                | -              | 1                | -              |
| >0.30 and ≤0.7                  | 2.27 (1.83-2.83) | < <b>0.001</b> | 2.48 (1.95-3.15) | < <b>0.001</b> |
| >0.7                            | 4.50 (3.66-5.54) | < <b>0.001</b> | 4.83 (3.84-6.08) | < <b>0.001</b> |

<sup>a</sup>Other includes American Indian/Alaskan native, and Asian/Pacific Islander.

<sup>b</sup>Histological grade are coded as followings: Well differentiated; Grade I; Moderately differentiated; Grade II; Poorly differentiated; Grade III; Unknown.

<sup>c</sup>bold type indicates significance

Supplementary Table 2: Univariate analysis of overall survival and disease-free survival among patients from FUSCC

| Variable                        | OS                |                       | DFS              |                       |
|---------------------------------|-------------------|-----------------------|------------------|-----------------------|
|                                 | HR (95% CI)       | <i>P</i> <sup>b</sup> | HR (95% CI)      | <i>P</i> <sup>b</sup> |
| Age at diagnosis                | 1.03 (1.01-1.06)  | <b>0.006</b>          | 1.01 (0.99-1.03) | 0.495                 |
| Laterity                        |                   |                       |                  |                       |
| Left-sided                      | 1                 | -                     | 1                | -                     |
| Right-sided                     | 0.94 (0.55-1.60)  | 0.814                 | 0.80(0.51-1.25)  | 0.320                 |
| Histological grade <sup>a</sup> |                   |                       |                  |                       |
| III                             | 1                 | -                     | 1                | -                     |
| II                              | 0.73 (0.41-1.30)  | 0.282                 | 0.73(0.45-1.20)  | 0.216                 |
| Tumor size                      |                   |                       |                  |                       |
| <2cm                            | 1                 | -                     |                  |                       |
| 2-5cm                           | 1.82 (0.93-3.54)  | 0.081                 | 2.16(1.24-3.75)  | <b>0.006</b>          |
| >5cm                            | 5.59 (2.10-14.93) | <b>0.001</b>          | 4.44(1.74-11.28) | <b>0.002</b>          |
| Surgery type                    |                   |                       |                  |                       |
| Mastectomy                      | 1                 | -                     | 1                | -                     |
| Lumpectomy                      | 0.34(0.08-1.38)   | 0.129                 | 0.43(0.16-1.17)  | 0.097                 |
| Radiotherapy                    |                   |                       |                  |                       |
| Without RT                      | 1                 | -                     | 1                | -                     |
| With RT                         | 0.80(0.44-1.47)   | 0.799                 | 0.97(0.60-1.56)  | 0.895                 |
| Adjuvant Chemotherapy           |                   |                       |                  |                       |
| Without CT                      | 1                 | -                     | 1                | -                     |
| With CT                         | 1.75(0.54-5.66)   | 0.347                 | 1.11(0.27-4.55)  | 0.88                  |
| Lymph node ratio                |                   |                       |                  |                       |
| ≤0.30                           | 1                 | -                     | 1                | -                     |
| >0.30 and ≤0.7                  | 1.47(0.74-2.91)   | 0.270                 | 1.89(1.09-3.26)  | <b>0.023</b>          |
| >0.7                            | 4.89(2.65-8.99)   | <b>&lt;0.001</b>      | 4.89(2.89-8.28)  | <b>&lt;0.001</b>      |

<sup>a</sup>Histological grade are coded as followings: Well differentiated; Grade I; Moderately differentiated; Grade II; Poorly differentiated; Grade III; Unknown.

<sup>b</sup>bold type indicates significance.

Supplementary Table 3: Effect of lymph node ratio and pN classification on survival among patients from SEER

| Variable                | OS                       |                | BCSS                     |                |
|-------------------------|--------------------------|----------------|--------------------------|----------------|
|                         | HR <sup>a</sup> (95% CI) | P <sup>b</sup> | HR <sup>a</sup> (95% CI) | P <sup>b</sup> |
| Lymph node ratio        |                          |                |                          |                |
| Low, ≤0.30              | 1                        | -              | 1                        | -              |
| Medium, >0.30 and ≤0.70 | 2.05 (1.63-2.59)         | <0.001         | 2.26 (1.75-2.92)         | <0.001         |
| High, >0.70             | 3.24 (2.56-4.09)         | <0.001         | 3.57 (2.76-4.62)         | <0.001         |
| pN                      |                          |                |                          |                |
| N1                      | 1                        | -              | 1                        | -              |
| N2                      | 1.53 (1.21-1.93)         | <0.001         | 1.63 (1.27-2.10)         | 0.001          |
| N3                      | 2.72 (2.14-3.46)         | <0.001         | 2.97 (2.29-3.85)         | <0.001         |

<sup>a</sup>Cox proportional hazards model. Hazard ratios are adjusted for age, race, histologic grade, tumor size, surgery type and radiotherapy.

<sup>b</sup>bold type indicates significance.
